# Supplementary material for: Effects of Three Aerobic Exercise Protocols on Acute Glucose Response and Continuous Glucose Monitoring Trends in Patients with Type 2 Diabetes Mellitus and Stroke: A Randomized Controlled Trial
Source: Research Square preprint supplement (doi:10.21203/rs.3.rs-6390697/v1), 2025-05-07
Supplement: Supplementary file 2 [file 84f6638a00755610806ad9bc.docx]

Table S1: Daily Mean MG Values of Participants During the Study Period

| Date | MG (mmol/L) | | | | Wald χ2 | *p* | *P* (Con vs LMICT) | *P* (Con vs MIIT) | *P* (Con vs REHIT) |
| --- | --- | --- | --- | --- | --- | --- | --- | --- | --- |
| CON | LMICT | MIIT | REHIT |
| 1 | 8.67±0.49 | 7.86±0.42 | 8.58±0.61 | 7.26±0.31 | 7.799 | 0.050 | 1.000 | 1.000 | 0.093 |
| 2 | 8.32±0.34 | 7.69±0.30 | 8.34±0.61 | 7.36±0.40 | 4.357 | 0.225 | 1.000 | 1.000 | 0.398 |
| 3 | 8.75±0.54 | 7.78±0.38 | 8.28±0.45 | 7.44±0.29 | 5.693 | 0.128 | 1.000 | 1.000 | 0.196 |
| 4 | 8.25±0.45 | 8.25±0.50 | 8.30±0.43 | 7.55±0.27 | 3.554 | 0.314 | 1.000 | 1.000 | 1.000 |
| 5 | 9.12±0.93 | 7.90±0.18 | 8.02±0.31 | 7.42±0.29 | 4.447 | 0.217 | 1.000 | 1.000 | 0.482 |
| 6 | 8.71±0.62 | 7.86±0.29 | 7.79±0.30 | 7.48±0.28 | 3.465 | 0.325 | 1.000 | 1.000 | 0.424 |
| 7 | 8.45±0.50 | 7.82±0.40 | 7.80±0.47 | 7.19±0.25 | 5.917 | 0.116 | 1.000 | 1.000 | 0.153 |
| 8 | 8.61±0.44 | 7.53±0.43 | 7.67±0.24 | 7.23±0.26 | 7.424 | 0.060 | 0.479 | 0.363 | 0.041 |
| 9 | 8.47±0.39 | 8.00±0.51 | 7.63±0.29 | 7.27±0.25 | 7.145 | 0.067 | 1.000 | 0.500 | 0.059 |
| 10 | 8.68±0.40 | 7.82±0.46 | 7.38±0.32 | 7.16±0.22 | 11.622 | 0.009 | 0.964 | 0.070 | 0.005 |
| 11 | 8.49±0.37 | 7.63±0.27 | 7.14±0.32 | 7.03±0.28 | 11.533 | 0.009 | 0.365 | 0.033 | 0.010 |
| 12 | 8.35±0.44 | 7.55±0.30 | 7.45±0.36 | 7.11±0.25 | 6.149 | 0.105 | 0.791 | 0.677 | 0.084 |
| 13 | 8.24±0.49 | 8.12±0.35 | 7.36±0.31 | 6.91±0.27 | 10.465 | 0.015 | 1.000 | 0.756 | 0.101 |
| 14 | 8.01±0.34 | 7.74±0.43 | 7.68±0.29 | 7.03±0.23 | 7.077 | 0.069 | 1.000 | 1.000 | 0.098 |
| 15 | 8.24±0.46 | 8.05±0.41 | 7.41±0.33 | 6.92±0.18 | 11.942 | 0.008 | 1.000 | 0.848 | 0.046 |
| 16 | 8.73±0.51 | 8.28±0.34 | 7.45±0.27 | 7.15±0.22 | 13.568 | 0.004 | 1.000 | 0.167 | 0.027 |
| 17 | 8.64±0.39 | 7.99±0.25 | 7.26±0.23 | 6.98±0.21 | 19.895 | 0.000 | 0.937 | 0.012 | 0.001 |
| 18 | 8.48±0.43 | 8.24±0.49 | 7.06±0.22 | 6.86±0.22 | 16.352 | 0.001 | 1.000 | 0.019 | 0.004 |
| 19 | 8.41±0.36 | 7.76±0.38 | 7.13±0.24 | 6.67±0.22 | 18.928 | 0.000 | 1.000 | 0.019 | <0.001 |
| 20 | 8.85±0.60 | 7.56±0.32 | 6.95±0.20 | 6.99±0.29 | 10.637 | 0.014 | 0.359 | 0.018 | 0.033 |
| 21 | 8.55±0.51 | 7.75±0.34 | 7.01±0.20 | 6.78±0.28 | 12.819 | 0.005 | 1.000 | 0.030 | 0.014 |
| 22 | 8.83±0.46 | 7.62±0.35 | 7.07±0.19 | 6.66±0.22 | 20.778 | 0.000 | 0.211 | 0.002 | <0.001 |
| 23 | 8.53±0.61 | 7.86±0.31 | 7.29±0.20 | 6.85±0.20 | 12.269 | 0.007 | 1.000 | 0.321 | 0.052 |
| 24 | 8.23±0.47 | 7.78±0.28 | 6.98±0.24 | 6.79±0.26 | 12.395 | 0.006 | 1.000 | 0.110 | 0.045 |
| 25 | 8.91±0.58 | 7.80±0.27 | 6.93±0.19 | 6.80±0.20 | 19.177 | 0.000 | 0.490 | 0.007 | 0.003 |
| 26 | 8.94±0.36 | 7.45±0.30 | 6.66±0.17 | 6.66±0.15 | 39.484 | 0.000 | 0.009 | <0.001 | <0.001 |
| 27 | 8.59±0.40 | 7.46±0.32 | 6.65±0.18 | 6.75±0.18 | 23.349 | 0.000 | 0.163 | <0.001 | <0.001 |
| 28 | 8.45±0.36 | 7.41±0.31 | 6.68±0.16 | 6.95±0.22 | 22.567 | 0.000 | 0.169 | <0.001 | 0.002 |

Table S2: Daily Peak Blood Glucose Values Across Experimental Groups During the Intervention Period

| Date | Peak Blood Glucose (mmol/L) | | | | Wald χ2 | *p* | *P* (Con vs LMICT) | *P* (Con vs MIIT) | *P* (Con vs REHIT) |
| --- | --- | --- | --- | --- | --- | --- | --- | --- | --- |
| CON | LMICT | MIIT | REHIT |
| 1 | 14.49±1.14 | 14.06±0.86 | 14.53±0.95 | 12.95±0.58 | 3.100 | 0.376 | 1.000 | 1.000 | 1.000 |
| 2 | 13.84±0.60 | 13.55±0.64 | 14.36±0.94 | 13.08±0.66 | 1.420 | 0.701 | 1.000 | 1.000 | 1.000 |
| 3 | 14.06±0.75 | 14.14±0.57 | 13.57±0.75 | 13.15±0.69 | 1.453 | 0.693 | 1.000 | 1.000 | 1.000 |
| 4 | 13.43±0.69 | 13.87±0.51 | 13.67±0.80 | 13.37±0.79 | 0.425 | 0.935 | 1.000 | 1.000 | 1.000 |
| 5 | 14.46±1.08 | 13.91±0.51 | 13.27±0.69 | 13.35±0.44 | 1.529 | 0.676 | 1.000 | 1.000 | 1.000 |
| 6 | 13.56±0.73 | 14.49±0.33 | 12.76±0.65 | 13.31±0.60 | 7.497 | 0.058 | 1.000 | 1.000 | 1.000 |
| 7 | 13.67±0.89 | 13.63±0.63 | 13.07±0.80 | 12.69±0.51 | 1.727 | 0.631 | 1.000 | 1.000 | 1.000 |
| 8 | 13.71±0.89 | 12.82±0.44 | 12.96±0.64 | 12.78±0.71 | 0.884 | 0.829 | 1.000 | 1.000 | 1.000 |
| 9 | 13.53±0.43 | 14.34±0.82 | 12.98±0.72 | 12.59±0.49 | 4.070 | 0.254 | 1.000 | 1.000 | 0.933 |
| 10 | 14.43±0.65 | 13.51±0.56 | 12.57±0.74 | 12.68±0.92 | 4.346 | 0.226 | 1.000 | 0.363 | 0.734 |
| 11 | 13.47±0.68 | 13.04±0.44 | 12.14±0.79 | 12.11±0.38 | 4.599 | 0.204 | 1.000 | 1.000 | 0.489 |
| 12 | 14.23±0.68 | 13.08±0.49 | 12.93±0.81 | 11.95±0.36 | 10.044 | 0.018 | 1.000 | 1.000 | 0.018 |
| 13 | 13.96±0.89 | 14.24±0.60 | 12.10±0.60 | 11.14±0.48 | 19.545 | <0.001 | 1.000 | 0.501 | 0.032 |
| 14 | 13.11±0.59 | 13.29±0.70 | 12.76±0.57 | 11.78±0.49 | 4.590 | 0.204 | 1.000 | 1.000 | 0.507 |
| 15 | 14.32±0.93 | 14.08±0.83 | 12.55±0.64 | 11.58±0.44 | 11.899 | 0.008 | 1.000 | 0.686 | 0.045 |
| 16 | 14.56±0.82 | 14.34±0.86 | 12.56±0.77 | 11.60±0.47 | 14.230 | 0.003 | 1.000 | 0.442 | 0.010 |
| 17 | 13.58±0.69 | 13.32±0.55 | 11.94±0.61 | 11.83±0.35 | 9.021 | 0.029 | 1.000 | 0.441 | 0.135 |
| 18 | 14.07±0.87 | 13.09±0.81 | 11.79±0.63 | 11.88±0.40 | 6.801 | 0.079 | 1.000 | 0.202 | 0.136 |
| 19 | 13.80±0.68 | 13.40±0.58 | 12.10±0.57 | 11.28±0.59 | 10.695 | 0.013 | 1.000 | 0.334 | 0.032 |
| 20 | 15.44±1.27 | 12.90±0.68 | 11.70±0.57 | 11.81±0.64 | 8.588 | 0.035 | 0.467 | 0.044 | 0.063 |
| 21 | 14.33±0.98 | 12.70±0.58 | 12.66±0.59 | 11.60±0.53 | 6.562 | 0.087 | 0.926 | 0.881 | 0.086 |
| 22 | 14.74±0.77 | 13.39±0.77 | 12.04±0.56 | 11.60±0.49 | 13.757 | 0.003 | 1.000 | 0.027 | 0.004 |
| 23 | 14.56±1.06 | 13.25±0.79 | 12.40±0.64 | 11.57±0.66 | 6.615 | 0.085 | 1.000 | 0.498 | 0.101 |
| 24 | 13.97±0.75 | 13.31±0.60 | 11.75±0.63 | 11.59±0.65 | 9.026 | 0.029 | 1.000 | 0.136 | 0.098 |
| 25 | 14.44±1.00 | 13.19±0.64 | 11.40±0.49 | 11.24±0.69 | 11.939 | 0.008 | 1.000 | 0.038 | 0.051 |
| 26 | 14.59±0.63 | 12.96±0.73 | 11.47±0.53 | 10.27±0.23 | 51.028 | <0.001 | 0.541 | 0.001 | <0.001 |
| 27 | 14.41±0.88 | 13.25±0.74 | 10.68±0.40 | 10.89±0.52 | 22.009 | <0.001 | 1.000 | 0.001 | 0.004 |
| 28 | 14.36±0.67 | 12.97±0.66 | 10.87±0.51 | 11.18±0.52 | 21.923 | <0.001 | 0.853 | <0.001 | 0.001 |
| *p* for trend | 1.000 | 0.161 | <0.001 | <0.001 |  |  |  |  |  |

Table S3: Daily Nadir Blood Glucose Values Across Experimental Groups During the Intervention Period

| Date | Nadir Blood Glucose (mmol/L) | | | | Wald χ2 | *p* | *P* (Con vs LMICT) | *P* (Con vs MIIT) | *P* (Con vs REHIT) |
| --- | --- | --- | --- | --- | --- | --- | --- | --- | --- |
| CON | LMICT | MIIT | REHIT |
| 1 | 4.38±0.29 | 4.42±0.35 | 4.28±0.28 | 3.78±0.27 | 3.267 | 0.352 | 1.000 | 1.000 | 0.764 |
| 2 | 4.05±0.28 | 4.14±0.31 | 3.70±0.36 | 3.99±0.32 | 0.912 | 0.822 | 1.000 | 1.000 | 1.000 |
| 3 | 4.59±0.51 | 4.30±0.38 | 4.30±0.34 | 4.26±0.33 | 0.322 | 0.956 | 1.000 | 1.000 | 1.000 |
| 4 | 4.64±0.39 | 4.99±0.49 | 4.17±0.33 | 4.32±0.27 | 2.377 | 0.498 | 1.000 | 0.993 | 1.000 |
| 5 | 5.54±0.60 | 4.61±0.28 | 4.23±0.30 | 4.52±0.38 | 3.883 | 0.274 | 0.978 | 0.311 | 0.908 |
| 6 | 5.12±0.33 | 4.41±0.32 | 4.18±0.20 | 4.29±0.32 | 5.919 | 0.116 | 0.760 | 0.098 | 0.436 |
| 7 | 4.80±0.34 | 4.36±0.43 | 4.32±0.30 | 4.29±0.20 | 1.756 | 0.625 | 1.000 | 1.000 | 1.000 |
| 8 | 5.06±0.33 | 4.58±0.43 | 4.43±0.31 | 4.62±0.27 | 2.104 | 0.551 | 1.000 | 0.959 | 1.000 |
| 9 | 4.61±0.36 | 4.65±0.36 | 4.46±0.19 | 4.57±0.25 | 0.343 | 0.952 | 1.000 | 1.000 | 1.000 |
| 10 | 5.16±0.40 | 4.70±0.35 | 4.05±0.21 | 4.23±0.12 | 7.621 | 0.055 | 1.000 | 0.088 | 0.161 |
| 11 | 4.66±0.29 | 4.57±0.27 | 4.06±0.19 | 4.43±0.23 | 4.159 | 0.245 | 1.000 | 0.511 | 1.000 |
| 12 | 4.78±0.43 | 4.64±0.20 | 4.19±0.26 | 4.33±0.23 | 2.801 | 0.423 | 1.000 | 1.000 | 1.000 |
| 13 | 4.96±0.44 | 5.02±0.23 | 3.96±0.21 | 4.15±0.27 | 14.007 | 0.003 | 1.000 | 0.229 | 0.668 |
| 14 | 4.51±0.26 | 4.55±0.42 | 4.05±0.25 | 3.76±0.21 | 6.382 | 0.094 | 1.000 | 0.004 | 0.146 |
| 15 | 4.54±0.34 | 4.19±0.34 | 4.07±0.27 | 3.91±0.19 | 2.725 | 0.436 | 1.000 | 1.000 | 0.645 |
| 16 | 4.75±0.41 | 4.95±0.39 | 4.16±0.28 | 4.42±0.29 | 3.249 | 0.355 | 1.000 | 1.000 | 1.000 |
| 17 | 5.06±0.37 | 4.81±0.33 | 4.16±0.20 | 4.08±0.20 | 8.271 | 0.041 | 1.000 | 0.189 | 0.119 |
| 18 | 4.44±0.35 | 4.80±0.35 | 4.28±0.24 | 3.88±0.20 | 5.943 | 0.114 | 1.000 | 1.000 | 1.000 |
| 19 | 4.26±0.22 | 4.98±0.26 | 3.99±0.35 | 3.92±0.14 | 13.694 | 0.003 | 0.196 | 1.000 | 1.000 |
| 20 | 4.61±0.32 | 4.54±0.33 | 3.85±0.14 | 4.23±0.13 | 8.624 | 0.035 | 1.000 | 0.177 | 1.000 |
| 21 | 4.82±0.33 | 4.41±0.25 | 3.83±0.23 | 4.22±0.20 | 6.654 | 0.084 | 1.000 | 0.087 | 0.718 |
| 22 | 4.55±0.26 | 4.39±0.35 | 4.05±0.11 | 3.81±0.21 | 5.687 | 0.128 | 1.000 | 0.458 | 0.172 |
| 23 | 4.73±0.46 | 4.65±0.22 | 3.69±0.18 | 3.98±0.17 | 13.585 | 0.004 | 1.000 | 0.221 | 0.767 |
| 24 | 4.70±0.36 | 4.67±0.25 | 3.92±0.26 | 4.13±0.19 | 6.368 | 0.095 | 1.000 | 0.477 | 0.956 |
| 25 | 5.15±0.36 | 4.17±0.24 | 3.81±0.21 | 4.27±0.23 | 10.446 | 0.015 | 0.151 | 0.008 | 0.239 |
| 26 | 4.86±0.33 | 4.03±0.24 | 3.86±0.15 | 4.05±0.12 | 7.630 | 0.054 | 0.246 | 0.035 | 0.118 |
| 27 | 5.00±0.21 | 4.10±0.19 | 4.02±0.17 | 4.22±0.13 | 15.119 | 0.002 | 0.009 | 0.002 | 0.009 |
| 28 | 4.49±0.37 | 4.13±0.19 | 3.84±0.20 | 4.06±0.10 | 2.682 | 0.443 | 1.000 | 0.738 | 1.000 |
| *p*for trend | 1.000 | 1.000 | 1.000 | 1.000 |  |  |  |  |  |

Table S4: Daily Mean TIR Values Across Experimental Groups During the Intervention Period

| Date | TIR (%) | | | | Wald χ2 | *p* | *P* (Con vs LMICT) | *P* (Con vs MIIT) | *P* (Con vs REHIT) |
| --- | --- | --- | --- | --- | --- | --- | --- | --- | --- |
| CON | LMICT | MIIT | REHIT |
| 1 | 68.51±7.65 | 78.98±4.61 | 69.97±7.29 | 81.82±2.89 | 4.358 | 0.225 | 1.000 | 1.000 | 0.623 |
| 2 | 72.72±4.42 | 80.78±3.19 | 68.32±7.17 | 82.95±3.18 | 6.085 | 0.108 | 0.837 | 1.000 | 0.362 |
| 3 | 69.01±6.43 | 74.73±5.54 | 75.62±5.57 | 84.43±2.89 | 6.778 | 0.079 | 1.000 | 1.000 | 0.172 |
| 4 | 74.04±5.11 | 75.05±7.39 | 73.79±5.79 | 83.14±3.30 | 3.606 | 0.307 | 1.000 | 1.000 | 0.806 |
| 5 | 67.35±8.65 | 79.52±3.37 | 78.07±4.39 | 83.46±2.90 | 3.734 | 0.292 | 1.000 | 1.000 | 0.465 |
| 6 | 70.69±7.88 | 78.52±2.56 | 83.35±2.75 | 84.58±2.60 | 5.080 | 0.166 | 1.000 | 0.776 | 0.565 |
| 7 | 75.96±6.26 | 78.29±5.39 | 77.23±4.72 | 88.14±1.98 | 8.857 | 0.031 | 1.000 | 1.000 | 0.381 |
| 8 | 73.13±6.37 | 81.02±5.43 | 84.47±2.29 | 88.29±2.42 | 5.916 | 0.116 | 1.000 | 0.563 | 0.156 |
| 9 | 71.15±7.13 | 74.44±5.72 | 85.05±3.74 | 87.65±2.68 | 7.971 | 0.047 | 1.000 | 0.506 | 0.182 |
| 10 | 72.15±6.13 | 78.62±6.04 | 82.72±4.17 | 89.60±3.02 | 8.029 | 0.045 | 1.000 | 0.923 | 0.064 |
| 11 | 73.69±5.44 | 83.47±3.04 | 86.72±2.15 | 88.51±2.99 | 6.489 | 0.090 | 0.700 | 0.156 | 0.102 |
| 12 | 68.75±6.50 | 85.32±3.13 | 85.15±4.00 | 89.72±2.71 | 8.995 | 0.029 | 0.131 | 0.191 | 0.018 |
| 13 | 75.24±4.95 | 79.49±4.78 | 82.04±3.47 | 92.13±2.52 | 13.804 | 0.003 | 1.000 | 1.000 | 0.014 |
| 14 | 77.16±5.28 | 80.56±5.04 | 81.55±3.73 | 91.21±2.50 | 9.734 | 0.021 | 1.000 | 1.000 | 0.097 |
| 15 | 77.36±4.95 | 73.45±5.62 | 82.95±3.50 | 90.54±2.00 | 13.906 | 0.003 | 1.000 | 1.000 | 0.081 |
| 16 | 69.51±7.56 | 76.62±5.09 | 86.33±2.73 | 90.83±2.18 | 12.650 | 0.005 | 1.000 | 0.219 | 0.041 |
| 17 | 74.00±5.21 | 81.22±3.16 | 88.45±2.35 | 89.89±1.82 | 12.465 | 0.006 | 1.000 | 0.069 | 0.024 |
| 18 | 69.89±7.41 | 76.68±6.83 | 91.45±1.72 | 91.20±1.51 | 12.351 | 0.006 | 1.000 | 0.027 | 0.029 |
| 19 | 74.36±5.88 | 81.41±3.70 | 87.04±2.52 | 91.32±1.95 | 11.553 | 0.009 | 1.000 | 0.284 | 0.037 |
| 20 | 73.10±7.20 | 81.25±4.34 | 89.89±2.10 | 90.44±2.82 | 8.245 | 0.041 | 1.000 | 0.151 | 0.149 |
| 21 | 71.75±7.37 | 82.91±4.97 | 86.32±2.37 | 91.43±2.21 | 8.799 | 0.032 | 1.000 | 0.359 | 0.063 |
| 22 | 67.38±7.46 | 83.04±3.76 | 89.58±2.52 | 89.88±2.92 | 10.006 | 0.019 | 0.366 | 0.029 | 0.030 |
| 23 | 71.70±8.20 | 84.13±3.60 | 83.43±2.89 | 89.59±3.31 | 4.902 | 0.179 | 0.991 | 1.000 | 0.259 |
| 24 | 75.42±6.27 | 86.20±3.15 | 86.75±3.17 | 92.11±2.02 | 8.337 | 0.040 | 0.746 | 0.642 | 0.068 |
| 25 | 73.28±6.54 | 82.91±2.50 | 90.91±1.98 | 91.89±2.51 | 13.688 | 0.003 | 1.000 | 0.060 | 0.048 |
| 26 | 67.16±6.73 | 83.11±2.95 | 92.38±1.53 | 96.76±1.03 | 37.818 | <0.001 | 0.179 | 0.002 | <0.001 |
| 27 | 74.22±5.91 | 81.89±3.74 | 94.14±1.78 | 95.98±1.47 | 23.240 | <0.001 | 1.000 | 0.007 | 0.002 |
| 28 | 75.45±5.04 | 81.69±2.68 | 90.57±2.01 | 94.58±1.86 | 23.948 | <0.001 | 1.000 | 0.032 | 0.002 |
| *p*for trend | 1.000 | 0.276 | 0.004 | <0.001 |  |  |  |  |  |

Table S5: Daily Mean TAR Values Across Experimental Groups During the Intervention Period

| Date | TAR (%) | | | | Wald χ2 | *p* | *P* (Con vs LMICT) | *P* (Con vs MIIT) | *P* (Con vs REHIT) |
| --- | --- | --- | --- | --- | --- | --- | --- | --- | --- |
| CON | LMICT | MIIT | REHIT |
| 1 | 29.57±7.46 | 19.91±4.59 | 27.65±7.32 | 13.30±2.58 | 7.420 | 0.060 | 1.000 | 1.000 | 0.236 |
| 2 | 25.11±4.23 | 17.78±2.84 | 26.66±7.30 | 12.64±3.01 | 7.391 | 0.060 | 0.901 | 1.000 | 0.098 |
| 3 | 29.44±6.81 | 23.17±5.59 | 22.83±5.81 | 14.15±3.12 | 5.750 | 0.124 | 1.000 | 1.000 | 0.248 |
| 4 | 23.93±5.08 | 24.53±7.41 | 24.95±5.72 | 14.15±2.81 | 5.461 | 0.141 | 1.000 | 1.000 | 0.552 |
| 5 | 32.05±8.75 | 19.26±3.10 | 20.26±4.42 | 13.83±2.26 | 6.000 | 0.112 | 1.000 | 1.000 | 0.262 |
| 6 | 29.05±7.84 | 19.98±2.82 | 15.21±2.82 | 13.28±2.34 | 6.170 | 0.104 | 1.000 | 0.579 | 0.322 |
| 7 | 23.34±6.28 | 20.02±5.49 | 20.81±5.12 | 10.98±2.16 | 7.132 | 0.068 | 1.000 | 1.000 | 0.376 |
| 8 | 26.55±6.39 | 18.33±5.46 | 14.50±2.05 | 10.93±2.53 | 6.004 | 0.111 | 1.000 | 0.435 | 0.138 |
| 9 | 27.01±6.80 | 23.26±6.10 | 14.85±3.75 | 10.03±2.19 | 9.133 | 0.028 | 1.000 | 0.707 | 0.105 |
| 10 | 27.48±6.15 | 20.97±6.16 | 14.55±3.78 | 9.41±2.72 | 8.957 | 0.030 | 1.000 | 0.440 | 0.043 |
| 11 | 25.49±5.53 | 15.48±3.17 | 9.97±2.02 | 8.79±2.34 | 9.902 | 0.019 | 0.696 | 0.049 | 0.032 |
| 12 | 29.95±6.62 | 14.23±3.11 | 13.20±3.62 | 7.85±1.74 | 12.883 | 0.005 | 0.190 | 0.159 | 0.007 |
| 13 | 23.95±4.90 | 20.51±4.78 | 15.07±3.47 | 5.31±2.07 | 19.880 | <0.001 | 1.000 | 0.838 | 0.003 |
| 14 | 22.34±5.34 | 16.83±4.62 | 16.42±3.83 | 7.06±2.12 | 11.472 | 0.009 | 1.000 | 1.000 | 0.047 |
| 15 | 21.16±4.93 | 23.76±5.13 | 13.83±3.50 | 7.37±1.51 | 16.508 | 0.001 | 1.000 | 1.000 | 0.045 |
| 16 | 29.85±7.72 | 21.09±5.01 | 11.77±2.43 | 7.69±2.18 | 12.357 | 0.006 | 1.000 | 0.154 | 0.035 |
| 17 | 25.43±5.30 | 18.07±3.27 | 10.41±2.42 | 8.03±1.71 | 15.144 | 0.002 | 1.000 | 0.060 | 0.011 |
| 18 | 29.39±7.58 | 22.76±6.92 | 7.22±1.67 | 6.53±1.19 | 13.882 | 0.003 | 1.000 | 0.026 | 0.017 |
| 19 | 24.27±5.65 | 18.42±3.78 | 9.45±2.54 | 5.88±1.74 | 16.701 | 0.001 | 1.000 | 0.101 | 0.011 |
| 20 | 26.65±7.14 | 15.12±4.63 | 8.46±2.09 | 8.54±2.77 | 7.481 | 0.058 | 1.000 | 0.087 | 0.108 |
| 21 | 28.04±7.39 | 15.67±5.17 | 10.51±2.00 | 7.46±2.20 | 8.529 | 0.036 | 1.000 | 0.132 | 0.046 |
| 22 | 30.78±6.90 | 15.87±4.04 | 9.73±2.41 | 5.54±1.66 | 17.174 | 0.001 | 0.373 | 0.024 | 0.002 |
| 23 | 26.89±8.24 | 15.17±3.82 | 13.67±2.98 | 7.63±2.48 | 7.373 | 0.061 | 1.000 | 0.788 | 0.151 |
| 24 | 22.68±6.09 | 13.07±3.21 | 9.00±2.24 | 7.47±1.91 | 7.106 | 0.069 | 0.975 | 0.209 | 0.102 |
| 25 | 26.01±6.55 | 14.58±2.42 | 6.46±1.83 | 7.55±2.35 | 14.217 | 0.003 | 0.609 | 0.024 | 0.048 |
| 26 | 31.65±6.58 | 15.08±2.88 | 5.87±1.33 | 2.70±0.92 | 35.282 | <0.001 | 0.127 | 0.001 | <0.001 |
| 27 | 25.18±5.80 | 15.05±2.91 | 4.03±1.50 | 3.68±1.28 | 25.268 | <0.001 | 0.711 | 0.002 | 0.002 |
| 28 | 23.67±5.18 | 14.75±2.77 | 6.59±1.72 | 5.04±1.86 | 18.263 | 0.000 | 0.773 | 0.010 | 0.004 |
| *p*for trend | 1.000 | 0.186 | 0.004 | 0.007 |  |  |  |  |  |

Table S6: Daily Mean TBR Values Across Experimental Groups During the Intervention Period

| Date | TBR (%) | | | | Wald χ2 | *p* | *P* (Con vs LMICT) | *P* (Con vs MIIT) | *P* (Con vs REHIT) |
| --- | --- | --- | --- | --- | --- | --- | --- | --- | --- |
| CON | LMICT | MIIT | REHIT |
| 1 | 1.92±1.03 | 1.11±0.56 | 2.37±1.06 | 4.88±2.34 | 3.357 | 0.340 | 1.000 | 1.000 | 1.000 |
| 2 | 2.17±1.19 | 1.44±0.99 | 5.02±1.49 | 4.41±2.30 | 4.749 | 0.191 | 1.000 | 0.817 | 1.000 |
| 3 | 1.55±0.60 | 2.10±0.95 | 1.55±0.57 | 1.43±0.70 | 0.348 | 0.951 | 1.000 | 1.000 | 1.000 |
| 4 | 2.04±1.55 | 0.42±0.31 | 1.26±0.69 | 2.71±1.94 | 3.273 | 0.351 | 1.000 | 1.000 | 1.000 |
| 5 | 0.59±0.50 | 1.22±0.76 | 1.66±0.64 | 2.72±1.75 | 2.682 | 0.443 | 1.000 | 1.000 | 1.000 |
| 6 | 0.25±0.24 | 1.50±0.65 | 1.45±0.93 | 2.15±1.42 | 5.749 | 0.125 | 0.446 | 1.000 | 1.000 |
| 7 | 0.70±0.39 | 1.69±0.56 | 2.78±1.19 | 0.88±0.41 | 4.392 | 0.222 | 0.898 | 0.574 | 1.000 |
| 8 | 0.32±0.30 | 0.65±0.39 | 1.03±0.44 | 0.78±0.38 | 2.031 | 0.566 | 1.000 | 1.000 | 1.000 |
| 9 | 1.85±1.16 | 2.30±1.78 | 0.10±0.10 | 2.32±1.83 | 5.185 | 0.159 | 1.000 | 0.802 | 1.000 |
| 10 | 0.37±0.33 | 0.41±0.36 | 2.73±1.11 | 0.99±0.74 | 4.669 | 0.198 | 1.000 | 0.248 | 1.000 |
| 11 | 0.82±0.46 | 1.05±0.68 | 3.31±1.70 | 2.70±2.15 | 2.618 | 0.454 | 1.000 | 0.939 | 1.000 |
| 12 | 1.29±0.77 | 0.45±0.43 | 1.65±0.77 | 2.43±2.15 | 2.830 | 0.419 | 1.000 | 1.000 | 1.000 |
| 13 | 0.82±0.45 | 0.00±0.00 | 2.89±1.37 | 2.56±1.64 | 10.174 | 0.017 | 0.413 | 0.909 | 1.000 |
| 14 | 0.50±0.39 | 2.61±1.36 | 2.03±0.70 | 1.73±0.69 | 6.245 | 0.100 | 0.816 | 0.334 | 0.714 |
| 15 | 1.47±0.56 | 2.79±1.53 | 3.22±1.09 | 2.09±1.44 | 2.394 | 0.495 | 1.000 | 0.926 | 1.000 |
| 16 | 0.65±0.33 | 2.29±1.48 | 1.90±0.82 | 1.48±0.85 | 3.412 | 0.332 | 1.000 | 0.928 | 1.000 |
| 17 | 0.57±0.38 | 0.71±0.51 | 1.14±0.50 | 2.08±1.36 | 1.718 | 0.633 | 1.000 | 1.000 | 1.000 |
| 18 | 0.72±0.37 | 0.56±0.39 | 1.33±0.56 | 2.27±0.82 | 4.407 | 0.221 | 1.000 | 1.000 | 0.500 |
| 19 | 1.36±0.80 | 0.17±0.16 | 3.51±1.32 | 2.80±1.29 | 12.116 | 0.007 | 0.859 | 0.980 | 1.000 |
| 20 | 0.25±0.19 | 3.63±2.61 | 1.65±0.77 | 1.02±0.46 | 6.466 | 0.091 | 1.000 | 0.484 | 0.758 |
| 21 | 0.22±0.12 | 1.42±1.02 | 3.16±0.90 | 1.11±0.52 | 14.070 | 0.003 | 1.000 | 0.007 | 0.584 |
| 22 | 1.84±1.65 | 1.09±0.64 | 0.69±0.38 | 4.58±2.66 | 2.622 | 0.454 | 1.000 | 1.000 | 1.000 |
| 23 | 1.41±0.79 | 0.70±0.64 | 2.90±1.05 | 2.78±1.63 | 3.954 | 0.267 | 1.000 | 1.000 | 1.000 |
| 24 | 1.90±1.28 | 0.73±0.66 | 4.25±2.24 | 0.43±0.24 | 4.193 | 0.241 | 1.000 | 1.000 | 1.000 |
| 25 | 0.71±0.43 | 2.51±1.74 | 2.63±0.87 | 0.56±0.35 | 5.861 | 0.119 | 1.000 | 0.291 | 1.000 |
| 26 | 1.19±0.69 | 1.81±0.80 | 1.75±0.53 | 0.54±0.25 | 5.966 | 0.113 | 1.000 | 1.000 | 1.000 |
| 27 | 0.60±0.57 | 3.06±2.59 | 1.84±0.76 | 0.35±0.24 | 4.448 | 0.217 | 1.000 | 1.000 | 1.000 |
| 28 | 0.87±0.34 | 3.56±3.00 | 2.84±0.93 | 0.38±0.22 | 8.298 | 0.040 | 1.000 | 0.288 | 1.000 |
| *p*for trend | 0.800 | 1.000 | 1.000 | 1.000 |  |  |  |  |  |

Table S7: Daily Mean MAGE Values Across Experimental Groups During the Intervention Period

| Date | MAGE (mmol/L) | | | | Wald χ2 | *p* | *P* (Con vs LMICT) | *P* (Con vs MIIT) | *P* (Con vs REHIT) |
| --- | --- | --- | --- | --- | --- | --- | --- | --- | --- |
| CON | LMICT | MIIT | REHIT |
| 1 | 6.18±0.92 | 6.57±0.69 | 6.76±0.90 | 5.79±0.39 | 1.652 | 0.648 | 1.000 | 1.000 | 1.000 |
| 2 | 6.15±0.71 | 5.67±0.61 | 6.95±0.95 | 5.93±0.40 | 1.347 | 0.718 | 1.000 | 1.000 | 1.000 |
| 3 | 5.71±0.52 | 5.99±0.49 | 5.52±0.42 | 5.19±0.55 | 1.254 | 0.740 | 1.000 | 1.000 | 1.000 |
| 4 | 6.05±0.67 | 5.12±0.46 | 6.00±0.71 | 5.91±0.57 | 2.123 | 0.547 | 1.000 | 1.000 | 1.000 |
| 5 | 5.87±0.60 | 5.93±0.47 | 5.73±0.52 | 5.53±0.60 | 0.307 | 0.959 | 1.000 | 1.000 | 1.000 |
| 6 | 5.37±0.60 | 6.45±0.60 | 5.46±0.59 | 5.68±0.43 | 1.989 | 0.575 | 1.000 | 1.000 | 1.000 |
| 7 | 5.42±0.63 | 5.89±0.64 | 5.24±0.61 | 5.88±0.40 | 1.072 | 0.784 | 1.000 | 1.000 | 1.000 |
| 8 | 5.25±0.49 | 5.29±0.54 | 5.20±0.51 | 5.16±0.49 | 0.039 | 0.998 | 1.000 | 1.000 | 1.000 |
| 9 | 5.56±0.40 | 6.08±0.77 | 4.55±0.48 | 5.53±0.50 | 4.091 | 0.252 | 1.000 | 0.625 | 1.000 |
| 10 | 6.02±0.67 | 5.26±0.46 | 5.15±0.56 | 6.16±1.15 | 1.541 | 0.673 | 1.000 | 1.000 | 1.000 |
| 11 | 5.62±0.72 | 5.15±0.40 | 4.91±0.55 | 4.95±0.40 | 0.784 | 0.853 | 1.000 | 1.000 | 1.000 |
| 12 | 6.10±0.56 | 5.45±0.35 | 5.65±0.64 | 4.66±0.43 | 4.705 | 0.195 | 1.000 | 1.000 | 0.248 |
| 13 | 5.51±0.69 | 5.59±0.54 | 5.23±0.53 | 4.59±0.48 | 2.307 | 0.511 | 1.000 | 1.000 | 1.000 |
| 14 | 5.64±0.50 | 5.39±0.66 | 5.46±0.45 | 5.10±0.65 | 0.439 | 0.932 | 1.000 | 1.000 | 1.000 |
| 15 | 6.24±0.70 | 5.37±0.55 | 4.95±0.62 | 4.68±0.43 | 3.876 | 0.275 | 1.000 | 1.000 | 0.347 |
| 16 | 6.29±0.62 | 5.92±0.76 | 4.82±0.77 | 4.71±0.46 | 5.240 | 0.155 | 1.000 | 0.814 | 0.247 |
| 17 | 5.22±0.58 | 5.54±0.72 | 4.55±0.49 | 4.85±0.39 | 1.606 | 0.658 | 1.000 | 1.000 | 1.000 |
| 18 | 6.36±0.66 | 5.26±0.68 | 4.98±0.62 | 5.27±0.44 | 2.727 | 0.436 | 1.000 | 0.760 | 0.995 |
| 19 | 6.85±0.97 | 4.92±0.45 | 5.34±0.41 | 4.55±0.48 | 5.083 | 0.166 | 0.421 | 0.906 | 0.199 |
| 20 | 6.49±0.80 | 5.40±0.52 | 4.71±0.64 | 4.69±0.56 | 4.144 | 0.246 | 1.000 | 0.497 | 0.395 |
| 21 | 5.78±0.65 | 5.14±0.52 | 5.50±0.59 | 4.54±0.33 | 4.165 | 0.244 | 1.000 | 1.000 | 0.535 |
| 22 | 7.04±0.66 | 5.91±0.56 | 4.80±0.45 | 5.48±0.76 | 8.330 | 0.040 | 1.000 | 0.029 | 0.727 |
| 23 | 6.42±0.71 | 5.37±0.68 | 5.18±0.51 | 4.52±0.53 | 4.636 | 0.201 | 1.000 | 0.936 | 0.194 |
| 24 | 5.70±0.72 | 4.97±0.46 | 4.80±0.49 | 4.29±0.40 | 3.289 | 0.349 | 1.000 | 1.000 | 0.524 |
| 25 | 6.38±0.88 | 5.97±0.63 | 4.33±0.40 | 4.05±0.36 | 11.656 | 0.009 | 1.000 | 0.206 | 0.086 |
| 26 | 6.06±0.78 | 5.56±0.58 | 4.55±0.53 | 3.35±0.25 | 22.015 | <0.001 | 1.000 | 0.650 | 0.006 |
| 27 | 5.45±0.58 | 5.56±0.62 | 3.74±0.39 | 3.63±0.45 | 12.269 | 0.007 | 1.000 | 0.088 | 0.079 |
| 28 | 6.15±0.60 | 5.29±0.55 | 4.04±0.39 | 4.36±0.27 | 11.155 | 0.011 | 1.000 | 0.018 | 0.039 |
| *p*for trend | 0.313 | 1.000 | 0.008 | <0.001 |  |  |  |  |  |

Table S8: Daily Mean SD-glucose Values Across Experimental Groups During the Intervention Period

| Date | SD-glucose (mmol/L) | | | | Wald χ2 | *p* | *P* (Con vs LMICT) | *P* (Con vs MIIT) | *P* (Con vs REHIT) |
| --- | --- | --- | --- | --- | --- | --- | --- | --- | --- |
| CON | LMICT | MIIT | REHIT |
| 1 | 2.38±0.33 | 2.35±0.23 | 2.59±0.36 | 2.20±0.13 | 1.348 | 0.718 | 1.000 | 1.000 | 1.000 |
| 2 | 2.35±0.21 | 2.29±0.18 | 2.75±0.25 | 2.18±0.14 | 3.970 | 0.265 | 1.000 | 1.000 | 1.000 |
| 3 | 2.28±0.23 | 2.23±0.19 | 2.21±0.18 | 1.94±0.13 | 2.987 | 0.394 | 1.000 | 1.000 | 1.000 |
| 4 | 2.21±0.21 | 1.97±0.16 | 2.25±0.20 | 2.13±0.17 | 1.535 | 0.674 | 1.000 | 1.000 | 1.000 |
| 5 | 2.20±0.19 | 2.29±0.18 | 2.23±0.17 | 2.12±0.13 | 0.666 | 0.881 | 1.000 | 1.000 | 1.000 |
| 6 | 2.16±0.24 | 2.26±0.15 | 2.06±0.15 | 2.09±0.13 | 1.026 | 0.795 | 1.000 | 1.000 | 1.000 |
| 7 | 2.17±0.27 | 2.20±0.18 | 2.16±0.19 | 1.91±0.09 | 3.216 | 0.359 | 1.000 | 1.000 | 1.000 |
| 8 | 2.08±0.22 | 2.00±0.18 | 1.99±0.14 | 1.95±0.20 | 0.203 | 0.977 | 1.000 | 1.000 | 1.000 |
| 9 | 2.16±0.25 | 2.29±0.23 | 1.97±0.19 | 1.96±0.14 | 1.910 | 0.591 | 1.000 | 1.000 | 1.000 |
| 10 | 2.24±0.22 | 2.15±0.16 | 2.10±0.20 | 2.00±0.25 | 0.553 | 0.907 | 1.000 | 1.000 | 1.000 |
| 11 | 2.14±0.25 | 2.06±0.16 | 1.95±0.17 | 1.78±0.12 | 3.087 | 0.378 | 1.000 | 1.000 | 1.000 |
| 12 | 2.24±0.21 | 2.04±0.12 | 2.20±0.26 | 1.75±0.11 | 6.961 | 0.073 | 1.000 | 1.000 | 0.227 |
| 13 | 2.14±0.25 | 2.07±0.18 | 2.00±0.16 | 1.71±0.12 | 4.750 | 0.191 | 1.000 | 1.000 | 0.725 |
| 14 | 2.01±0.18 | 2.09±0.24 | 2.15±0.15 | 1.88±0.14 | 1.775 | 0.620 | 1.000 | 1.000 | 1.000 |
| 15 | 2.43±0.29 | 2.36±0.27 | 1.97±0.20 | 1.78±0.12 | 6.891 | 0.075 | 1.000 | 1.000 | 0.254 |
| 16 | 2.43±0.21 | 2.28±0.26 | 1.92±0.22 | 1.78±0.15 | 7.797 | 0.050 | 1.000 | 0.537 | 0.061 |
| 17 | 2.13±0.18 | 2.12±0.21 | 1.82±0.15 | 1.78±0.08 | 4.692 | 0.196 | 1.000 | 1.000 | 0.463 |
| 18 | 2.37±0.25 | 1.99±0.19 | 1.77±0.13 | 1.82±0.09 | 5.527 | 0.137 | 1.000 | 0.184 | 0.203 |
| 19 | 2.51±0.33 | 2.00±0.15 | 2.00±0.12 | 1.76±0.13 | 5.423 | 0.143 | 0.938 | 0.866 | 0.191 |
| 20 | 2.59±0.35 | 2.17±0.20 | 1.84±0.17 | 1.76±0.16 | 6.283 | 0.099 | 1.000 | 0.334 | 0.192 |
| 21 | 2.27±0.25 | 2.02±0.19 | 2.08±0.18 | 1.70±0.12 | 6.107 | 0.107 | 1.000 | 1.000 | 0.246 |
| 22 | 2.59±0.27 | 2.12±0.19 | 1.87±0.14 | 1.88±0.17 | 6.318 | 0.097 | 0.961 | 0.123 | 0.162 |
| 23 | 2.44±0.25 | 1.94±0.19 | 2.13±0.19 | 1.83±0.20 | 4.191 | 0.242 | 0.639 | 1.000 | 0.345 |
| 24 | 2.23±0.24 | 2.03±0.17 | 1.87±0.18 | 1.69±0.11 | 5.792 | 0.122 | 1.000 | 1.000 | 0.229 |
| 25 | 2.54±0.34 | 2.20±0.18 | 1.76±0.14 | 1.55±0.12 | 13.817 | 0.003 | 1.000 | 0.186 | 0.035 |
| 26 | 2.52±0.29 | 2.07±0.18 | 1.69±0.14 | 1.44±0.08 | 21.448 | <0.001 | 1.000 | 0.062 | 0.002 |
| 27 | 2.21±0.27 | 2.12±0.22 | 1.53±0.13 | 1.53±0.15 | 10.079 | 0.018 | 1.000 | 0.143 | 0.162 |
| 28 | 2.42±0.23 | 2.08±0.17 | 1.70±0.13 | 1.68±0.12 | 11.128 | 0.011 | 1.000 | 0.043 | 0.031 |
| *p*for trend | 1.000 | 1.000 | <0.001 | <0.001 |  |  |  |  |  |

Table S9: Daily Mean CV of Glucose Values Across Experimental Groups During the Intervention Period

| Date | CV (%) | | | | Wald χ2 | *p* | *P* (Con vs LMICT) | *P* (Con vs MIIT) | *P* (Con vs REHIT) |
| --- | --- | --- | --- | --- | --- | --- | --- | --- | --- |
| CON | LMICT | MIIT | REHIT |
| 1 | 26.60±3.16 | 29.74±2.46 | 29.77±3.30 | 30.57±1.92 | 1.165 | 0.762 | 1.000 | 1.000 | 1.000 |
| 2 | 28.26±2.48 | 29.81±2.17 | 33.31±2.75 | 30.11±2.23 | 1.938 | 0.585 | 1.000 | 1.000 | 1.000 |
| 3 | 26.57±2.60 | 29.19±2.66 | 26.90±2.11 | 26.45±1.79 | 0.798 | 0.850 | 1.000 | 1.000 | 1.000 |
| 4 | 27.08±2.65 | 24.31±1.91 | 26.89±2.23 | 28.44±2.33 | 2.078 | 0.556 | 1.000 | 1.000 | 1.000 |
| 5 | 24.74±1.88 | 28.91±2.34 | 27.54±1.58 | 29.11±2.18 | 3.040 | 0.386 | 0.992 | 1.000 | 0.770 |
| 6 | 24.84±2.38 | 29.35±2.53 | 26.27±1.82 | 28.45±2.21 | 2.268 | 0.519 | 1.000 | 1.000 | 1.000 |
| 7 | 25.27±2.83 | 28.35±2.25 | 27.53±2.05 | 26.72±1.12 | 0.860 | 0.835 | 1.000 | 1.000 | 1.000 |
| 8 | 23.85±2.15 | 27.33±2.52 | 25.64±1.51 | 26.99±2.57 | 1.406 | 0.704 | 1.000 | 1.000 | 1.000 |
| 9 | 25.15±2.30 | 28.69±2.23 | 25.40±1.94 | 27.05±1.80 | 1.716 | 0.633 | 1.000 | 1.000 | 1.000 |
| 10 | 25.95±2.41 | 27.96±2.20 | 28.26±2.36 | 28.06±3.46 | 0.583 | 0.900 | 1.000 | 1.000 | 1.000 |
| 11 | 25.01±2.82 | 27.31±2.23 | 27.11±2.05 | 25.64±1.73 | 0.715 | 0.870 | 1.000 | 1.000 | 1.000 |
| 12 | 26.79±2.04 | 27.29±1.48 | 28.72±2.59 | 24.89±1.76 | 1.825 | 0.609 | 1.000 | 1.000 | 1.000 |
| 13 | 25.59±2.57 | 25.80±2.24 | 26.84±1.63 | 24.86±1.50 | 0.803 | 0.849 | 1.000 | 1.000 | 1.000 |
| 14 | 24.91±1.91 | 27.01±2.58 | 27.49±1.20 | 26.69±1.60 | 1.319 | 0.725 | 1.000 | 1.000 | 1.000 |
| 15 | 28.95±2.44 | 29.16±3.11 | 26.48±2.49 | 25.75±1.61 | 1.772 | 0.621 | 1.000 | 1.000 | 1.000 |
| 16 | 28.10±2.14 | 27.29±2.85 | 25.80±3.03 | 25.01±1.86 | 1.328 | 0.723 | 1.000 | 1.000 | 1.000 |
| 17 | 24.45±1.69 | 26.66±2.83 | 24.80±1.55 | 25.77±1.27 | 0.727 | 0.867 | 1.000 | 1.000 | 1.000 |
| 18 | 27.57±2.14 | 24.15±1.95 | 25.00±1.69 | 26.80±1.57 | 2.023 | 0.568 | 1.000 | 1.000 | 1.000 |
| 19 | 29.16±2.90 | 25.66±1.46 | 28.14±1.55 | 26.31±1.82 | 2.082 | 0.556 | 1.000 | 1.000 | 1.000 |
| 20 | 28.50±2.62 | 28.72±2.62 | 26.23±2.30 | 24.97±1.81 | 2.013 | 0.570 | 1.000 | 1.000 | 1.000 |
| 21 | 26.45±2.40 | 25.96±2.14 | 29.53±2.35 | 25.15±1.60 | 2.419 | 0.490 | 1.000 | 1.000 | 1.000 |
| 22 | 29.25±2.66 | 27.71±2.29 | 26.17±1.59 | 28.37±2.81 | 1.222 | 0.748 | 1.000 | 1.000 | 1.000 |
| 23 | 28.57±2.44 | 24.43±2.04 | 28.82±2.02 | 26.35±2.33 | 2.880 | 0.411 | 1.000 | 1.000 | 1.000 |
| 24 | 27.27±2.78 | 26.15±2.31 | 26.90±2.75 | 24.88±1.37 | 0.901 | 0.825 | 1.000 | 1.000 | 1.000 |
| 25 | 28.00±2.91 | 28.37±2.29 | 25.18±1.74 | 22.77±1.61 | 5.113 | 0.164 | 1.000 | 1.000 | 0.698 |
| 26 | 27.69±2.71 | 27.69±2.19 | 25.16±1.71 | 21.68±1.23 | 8.697 | 0.034 | 1.000 | 1.000 | 0.260 |
| 27 | 25.30±2.45 | 28.56±3.10 | 22.81±1.66 | 22.74±2.08 | 3.320 | 0.345 | 1.000 | 1.000 | 1.000 |
| 28 | 28.52±2.33 | 28.00±1.92 | 25.26±1.65 | 24.12±1.26 | 4.563 | 0.207 | 1.000 | 1.000 | 0.577 |
| *p*for trend | 1.000 | 1.000 | 0.171 | 0.001 |  |  |  |  |  |
